# Supplementary material for: Spectrochemical analysis of sycamore (Acer pseudoplatanus) leaves for environmental health monitoring
Source: Royal Society of Chemistry journal article supplement (doi:10.1039/c6an00392c), 2016-01-01
Supplement: c6an00392c1.pdf [file c6an00392c1.pdf]

# Electronic Supporting Information

## **Spectrochemical analysis of sycamore (*Acer pseudoplatanus*) leaves for environmental health monitoring**

*James Ord<sup>a,b</sup>, Holly J. Butler<sup>b</sup>, Martin R. McAinsh<sup>b\*</sup>, and  
Francis L. Martin<sup>b,c\*</sup>*

<sup>a</sup>Department of Animal and Plant Science, University of Sheffield, Sheffield S10 2TN, UK; <sup>b</sup>Centre for Biophotonics, Lancaster Environment Centre, Lancaster University, Lancaster LA1 4YQ, UK; <sup>c</sup>School of Pharmacy and Biomedical Sciences, University of Central Lancashire, Preston PR1 2HE, UK

\*Corresponding authors: Prof Francis L Martin / Dr Martin R McAinsh; *Email:*  
[f.martin@lancaster.ac.uk](mailto:f.martin@lancaster.ac.uk); [m.mcainsh@lancaster.ac.uk](mailto:m.mcainsh@lancaster.ac.uk)

### **Summary**

- **Number of pages: 4**
- **Number of Figures: 2**
- **Number of Tables: 2**

**A)**

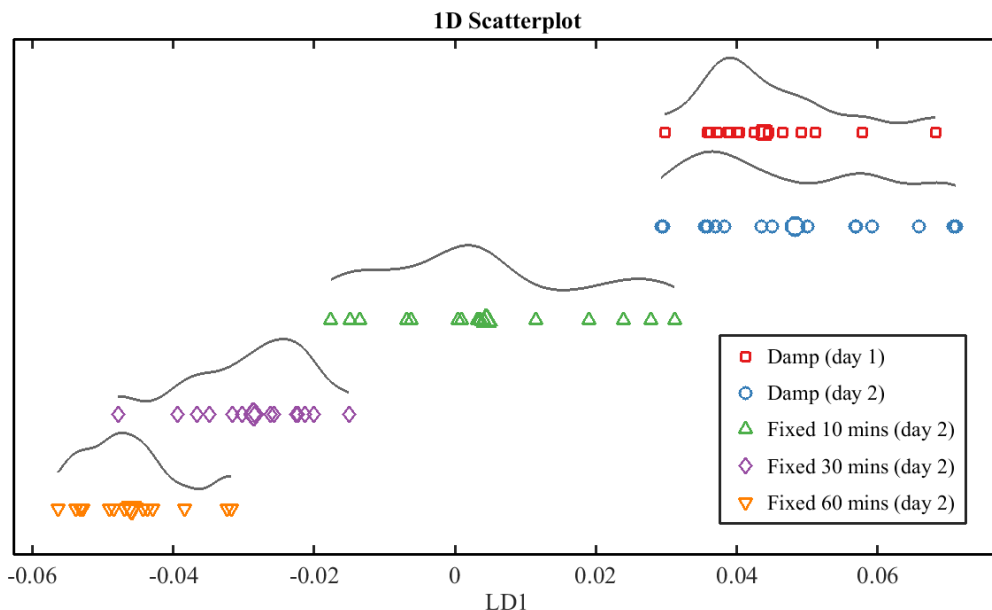

| One-way ANOVA                           | LD1         |
|-----------------------------------------|-------------|
| Damp (day 1) vs. Damp (day 2)           | $P > 0.05$  |
| Damp (day 1) vs. Fixed, 10 mins (day 2) | $P < 0.001$ |
| Damp (day 1) vs. Fixed, 30 mins (day 2) | $P < 0.001$ |
| Damp (day 1) vs. Fixed, 60 mins (day 2) | $P < 0.001$ |

**B)**

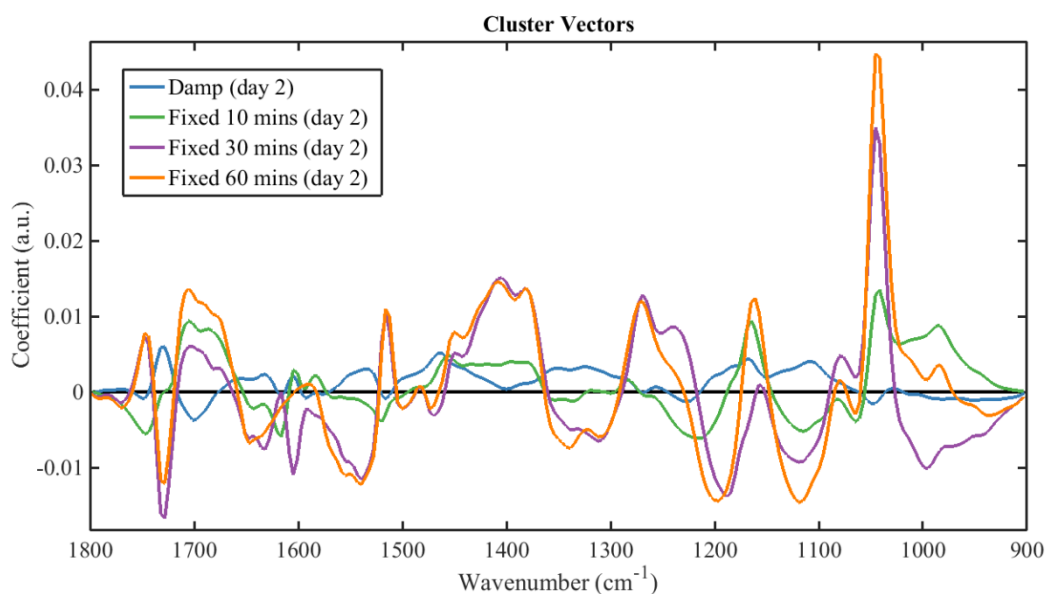

**Figure S1 (A)** One-D PCA-LDA scores plot derived from *A. pseudoplatanus* leaf tissue under different fixation conditions. Leaves (5×) were fixed in 70% ethanol for 10, 30 or 60 min, left to dry for 2 h and wrapped in aluminium foil. A further 5× leaves were not fixed and instead stored in zip-lock bags containing damp cotton wool. Spectra were acquired from fixed leaves ≈24 h after collection. Spectra were acquired from damp leaves on the day of collection, and ≈24 h after collection. Spectra (3×) were acquired per leaf. The damp condition had no significant effect on LD1 after 24 h, but ethanol at all three immersion times had a highly significant effect on LD1 as determined by one-way ANOVA ( $P < 0.001$ ). **(B)** Cluster vectors plot by PCA-LDA indicating wavenumber basis for segregation after fixation of *A. pseudoplatanus* leaf tissue with 70% ethanol, plus non-fixed leaves, 24 h after collection. Each class is compared with non-fixed leaves on the day of collection. The magnitude of the cluster vector peak or trough is proportional to the extent of biochemical alteration compared to non-fixed leaves on the day of collection.

**Table S1** Average Fv/Fm readings taken from the leaves of mature *A. pseudoplatanus* trees at the three main field sites. Student's T-tests revealed no significant difference between polluted sites and Reference.

| Site   | Average Fv/Fm | Number of readings | Significance (vs. ref. site) |
|--------|---------------|--------------------|------------------------------|
| Site 1 | 0.81          | 20                 |                              |
| Site 2 | 0.82          | 25                 | N/S                          |
| Site 3 | 0.81          | 18                 | N/S                          |

(N/S) No significance ( $p > 0.05$ )

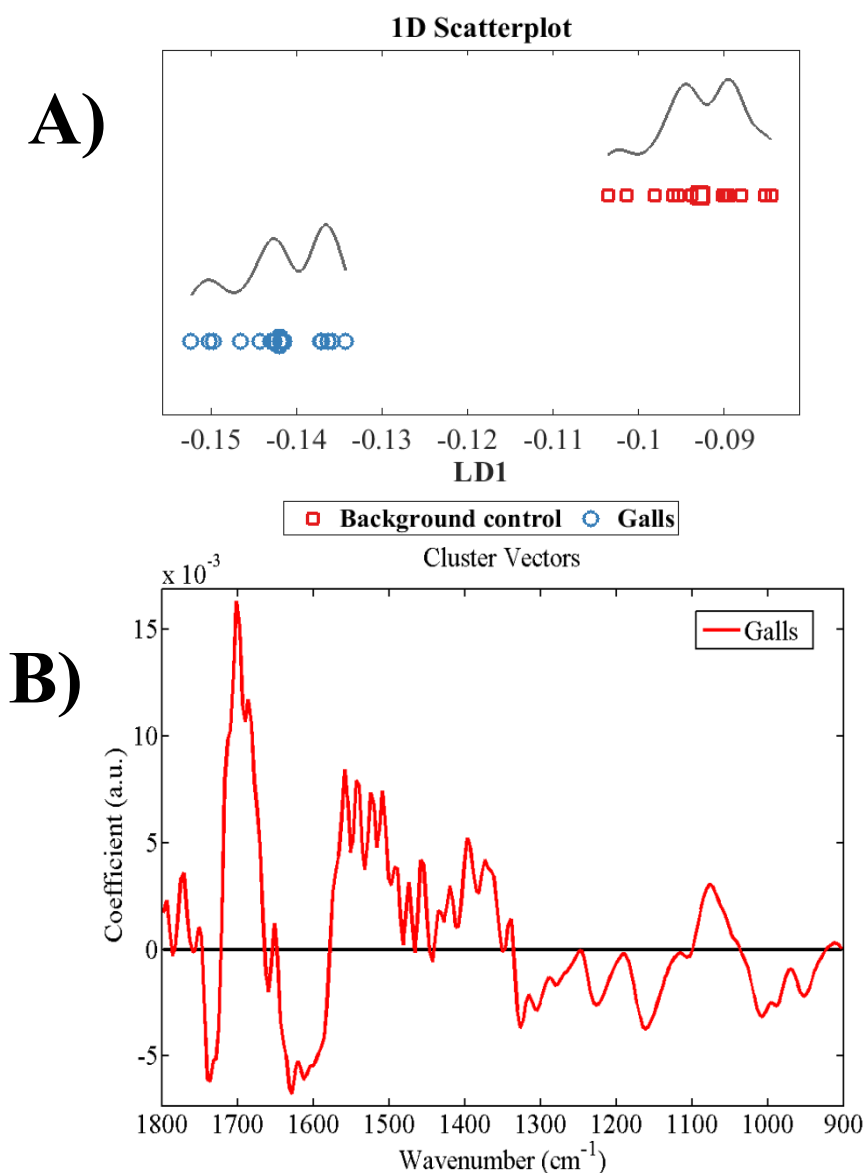

**Figure S2 (A)** One-D PCA-LDA scores plot of spectra derived from *A. pseudoplatanus* leaf tissue afflicted by galls of the mite *Artacris macrorhynchus*, compared to the background control leaf tissue (displaying no obvious affliction). Segregation in LD1 space was highly significant ( $P < 0.001$ ) as determined by Student's T-test. **(B)** Cluster vectors plot by PCA-LDA indicating wavenumber basis for segregation in *A. pseudoplatanus* leaf tissue afflicted by galls, compared with the background control leaf tissue (origin).

**Table S2** Top six discriminating wavenumbers (in descending order) identified by cluster vectors, associated with differences in *A. pseudoplatanus* leaves afflicted by leaf galls of the mite *Artacris macrorhynchus*, in relation to background control leaves. Tentative chemical assignments from Movasaghi *et al* (2008), Schulz and Baranska (2006), and Stuart (2004).

| Wavenumber (cm <sup>-1</sup> ) | Tentative assignment(s)    | Response (relative B.C.) |
|--------------------------------|----------------------------|--------------------------|
| 1701                           | Lipid; fatty acid esters   | Increase                 |
| 1585                           | Amide I                    | Decline                  |
| 1520                           | Amide II                   | Increase                 |
| 1632                           | Amide I; Pectin            | Decline                  |
| 1458                           | Protein; $\delta_{as}CH_3$ | Increase                 |
| 1169                           | Carbohydrate               | Decline                  |
